# Supplementary material for: Rethinking the Value and Emission Implications of Green Bonds
Source: Atypon-hosted journal article supplement (doi:10.1287/mnsc.2023.00961), 2025-09-18
Supplement: mnsc.2023.00961.sm1.pdf [file mnsc.2023.00961.sm1.pdf]

**Online Appendix**

**of**

**“Rethinking the Value and Emission Implications of Green Bonds”**

Jitendra Aswani  
IIM U, MIT Sloan

Shivaram Rajgopal  
Columbia Business School

June 2025

## Appendix B

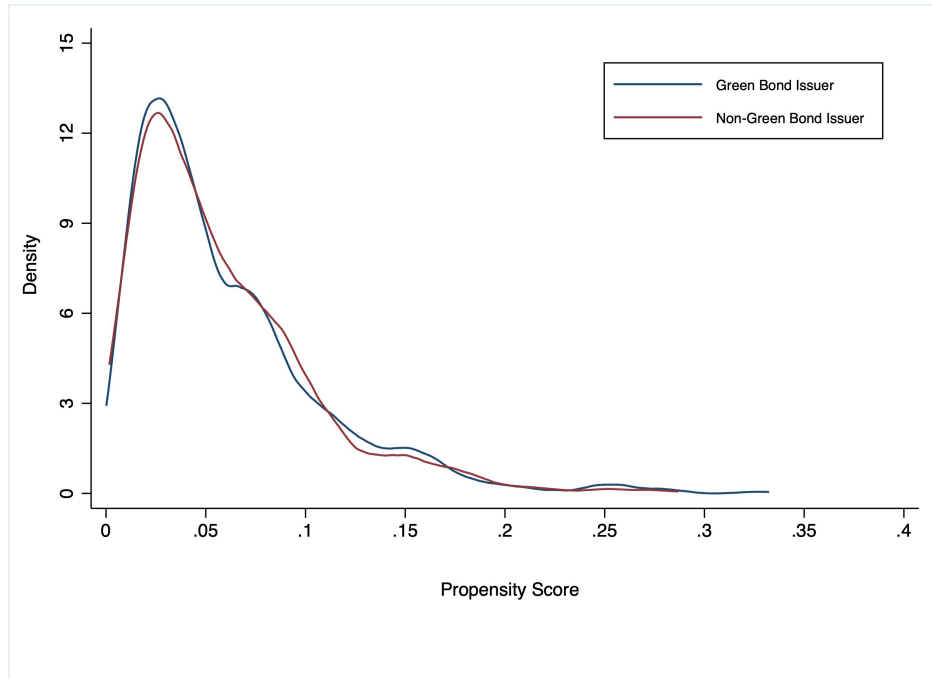

**Figure 6: Kernel Density of Propensity Score: Green Bond Issuer vs Non-Green Bond Issuer.** This figure shows the kernel density of propensity score for green bond issuer and matched firms. The green bonds are issued from 1<sup>st</sup> January 2013 to 31<sup>st</sup> December 2022.

**Table B1: Impact of green bonds on Carbon Intensity – Disclosed vs. Estimated**

This table reports the regression estimates of carbon intensity for green bond issuer with respect to a matched firm from 1<sup>st</sup> January 2013 to 31<sup>st</sup> December 2022. The green bond issuer matched with comparable firms based on industry, year, and firm characteristics. Carbon Intensity is ratio of carbon emissions to revenue measured as tonnes per USD. Estimated is an indicator variable which takes value 1 if the carbon emissions value is vendor-estimated and 0 for disclosed. *Green Bond Issuer* is a dummy variable which takes value 1 if the firm has issued at least one green bond in that year and 0 for matched firm. Country-year denotes country-by-year fixed effects, industry-year denotes industry-by-year fixed effect, and cluster (industry) denotes clustering errors at the industry (BICS level 2) level. *Size* is firm size measured as natural logarithm of total assets. *Leverage* is firm's leverage measured as total debt to equity ratio. *ROE* is return of equity measured as net income to total common equity value. *Sales Growth* is growth in sales with respect to last year. All variables are as defined in Appendix A. Standard errors are reported in parentheses. Standard errors are reported in parentheses. \*\*\*, \*\*, and \* denote statistical significance at the two-tailed 1%, 5%, and 10% level, respectively.

|                   | (1)                  | (2)                  | (3)                 |
|-------------------|----------------------|----------------------|---------------------|
|                   | Full Sample          | Disclosed            | Estimated           |
| VARIABLES         | Carbon Intensity     | Carbon Intensity     | Carbon Intensity    |
| Green Bond Issuer | 5.017<br>(5.003)     | 5.143<br>(7.343)     | 13.093**<br>(6.109) |
| Size              | 8.245***<br>(1.668)  | 10.676***<br>(2.372) | -0.701<br>(2.486)   |
| Leverage          | -0.016<br>(0.132)    | -0.160<br>(0.193)    | 0.285*<br>(0.163)   |
| ROE               | -0.133<br>(0.107)    | -0.407**<br>(0.164)  | 0.175<br>(0.213)    |
| Sales Growth      | 0.015<br>(0.062)     | 0.084<br>(0.106)     | -0.078<br>(0.058)   |
| Constant          | -35.483*<br>(20.411) | -45.284<br>(29.755)  | 28.111<br>(29.640)  |
| Observations      | 3,761                | 2,610                | 1,151               |
| R-squared         | 0.660                | 0.703                | 0.820               |
| Industry-Year     | Yes                  | Yes                  | Yes                 |
| Country-Year      | Yes                  | Yes                  | Yes                 |

**Table B2: Green Bond Issuances and Institutional Ownership**

This table reports the regression results of institutional ownership on green bond issuer with respect to matched firm from 1<sup>st</sup> January 2013 to 31<sup>st</sup> December 2022. The green bond issuer matched with comparable firms based on industry, year, and firm characteristics. *Institutional Ownership* is ratio of institutions ownership in a firm. *Chg. Institutional Ownership* is change in institutional ownership between contemporaneous and one-year ahead. *Percent Chg. Institutional Ownership* is percentage change in institutional ownership between contemporaneous and one-year ahead. *Green Bond Issuer* is a dummy variable which takes value 1 if the firm has issued at least one green bond in that year and 0 for matched firm. Country denotes country level fixed effects, industry-year denotes industry-by-year fixed effect, and cluster (industry) denotes clustering errors at the industry (BICS level 2) level. *Size* is firm size measured as natural logarithm of total assets. *Leverage* is firm's leverage measured as total debt to equity ratio. *ROE* is return of equity measured as net income to total common equity value. *Sales Growth* is growth in sales with respect to last year. All variables are as defined in Appendix A. Standard errors are reported in parentheses. Standard errors are reported in parentheses. \*\*\*, \*\*, and \* denote statistical significance at the two-tailed 1%, 5%, and 10% level, respectively.

| VARIABLES         | (1)<br>Inst.<br>Ownership | (2)<br>Chg. Inst.<br>Ownership | (3)<br>(Percent Chg. Inst. Ownership<br>(%)) |
|-------------------|---------------------------|--------------------------------|----------------------------------------------|
| Green Bond Issuer | 0.013***<br>(0.004)       | 0.006***<br>(0.002)            | -0.831<br>(2.594)                            |
| Size              | 0.027***<br>(0.001)       | -0.002***<br>(0.000)           | -1.138<br>(0.721)                            |
| Leverage          | -4.139***<br>(0.892)      | 0.405<br>(0.376)               | 214.141<br>(599.135)                         |
| ROE               | 0.057***<br>(0.007)       | 0.008**<br>(0.003)             | 0.050<br>(4.929)                             |
| Sales Growth      | -0.004<br>(0.003)         | 0.002<br>(0.001)               | 2.442<br>(2.095)                             |
| Constant          | -0.130***<br>(0.012)      | 0.018***<br>(0.005)            | 14.908*<br>(8.137)                           |
| Observations      | 6,459                     | 5,369                          | 5,369                                        |
| R-squared         | 0.805                     | 0.238                          | 0.329                                        |
| Industry_Year     | Yes                       | Yes                            | Yes                                          |
| Country           | Yes                       | Yes                            | Yes                                          |

**Table B3: Sector Classification**

This table reports the univariate cumulative abnormal returns (CARs) using a different sector classification. Rather than classifying the sectors based on financial and polluting (energy, utility, materials, and industrials), traditional sector classification is used i.e., financial and non-financial. Columns (1) – (3) show the results using 2013-2022 sample and columns (4) – (6) show the results using the sample 2013-2018. N is number of unique events. All variables are as defined in Appendix A. Standard errors are reported in parentheses. \*\*\*, \*\*, and \* denote statistical significance at the two-tailed 1%, 5%, and 10% level, respectively.

| Variable\Events | Sample: 2013-2022 |                   |                      | Sample: 2013-2018 (Flammer – 2021) |                     |                      |
|-----------------|-------------------|-------------------|----------------------|------------------------------------|---------------------|----------------------|
|                 | Full Sample       | Financial Sector  | Non-Financial Sector | Full Sample                        | Financial Sector    | Non-Financial Sector |
|                 | N=2081            | N=1274            | N=807                | N=405                              | N=253               | N=152                |
|                 | (1)               | (2)               | (3)                  | (4)                                | (5)                 | (6)                  |
| CAR (-1,1)      | -0.048<br>(0.070) | 0.024<br>(0.079)  | -0.159<br>(0.130)    | 0.059<br>(0.105)                   | 0.088<br>(0.139)    | 0.009<br>(0.158)     |
| CAR (-2,2)      | -0.040<br>(0.087) | -0.010<br>(0.107) | -0.086<br>(0.147)    | -0.022<br>(0.141)                  | 0.092<br>(0.185)    | -0.212<br>(0.217)    |
| CAR (-3,3)      | -0.028<br>(0.103) | 0.044<br>(0.127)  | -0.137<br>(0.173)    | 0.010<br>(0.163)                   | 0.212<br>(0.218)    | -0.327<br>(0.236)    |
| CAR (-4,4)      | 0.034<br>(0.118)  | 0.027<br>(0.148)  | 0.045<br>(0.194)     | 0.102<br>(0.177)                   | 0.193<br>(0.220)    | -0.050<br>(0.296)    |
| CAR (-5,5)      | 0.149<br>(0.129)  | 0.216<br>(0.161)  | 0.040<br>(0.216)     | 0.231<br>(0.195)                   | 0.437*<br>(0.236)   | -0.111<br>(0.340)    |
| CAR (-5,10)     | 0.274*<br>(0.157) | 0.330*<br>(0.194) | 0.186<br>(0.266)     | 0.539**<br>(0.239)                 | 0.872***<br>(0.292) | -0.015<br>(0.409)    |

**Table B4: Primary Market of Green Bonds**

This table reports the regression estimates of primary market yield for green bond with respect to conventional bond by the same issuer. Green Bond is indicator variable which takes value 1 if a bond is green bond and 0 if a bond is conventional bond by the same firm in the same year. Finance is indicator variable which takes value 1 if an issued bond is by finance firm, otherwise 0. Column (1) reports the results for sample 2013-2018. Column (2) reports the results for sample 2013-2022. Column (3) reports the results for sample 2013-2021. Column (4) reports the results for sample 2013-2022 for interaction between Green Bond indicator and Finance indicator. Column (5) reports the results for sample 2013-2022 (Excl. 2021) for interaction between Green Bond indicator and Finance indicator. Firm-Year is firm and year fixed effects. Industry-Year is industry and year fixed effects. Country-Year is country and year fixed effects. All variables are as defined in Appendix A. Clustering of errors are at firm-year, industry-year, and country-year level. Standard errors are reported in parentheses. \*\*\*, \*\*, and \* denote statistical significance at the two-tailed 1%, 5%, and 10% level, respectively.

| Sample               | 2013-2018           | 2013-2022           | 2013-2022<br>(Excl. 2021) | 2013-2022           | 2013-2022<br>(Excl. 2021) |
|----------------------|---------------------|---------------------|---------------------------|---------------------|---------------------------|
| VARIABLES            | (1)<br>Yield        | (2)<br>Yield        | (3)<br>Yield              | (4)<br>Yield        | (5)<br>Yield              |
| Green Bond           | -0.705<br>(0.437)   | 1.710***<br>(0.569) | 0.522<br>(0.321)          | 1.660**<br>(0.677)  | 0.338<br>(0.214)          |
| Finance              |                     |                     |                           | -0.470<br>(0.557)   | -0.103<br>(0.226)         |
| Green Bond x Finance |                     |                     |                           | 0.286<br>(1.078)    | 0.512<br>(0.551)          |
| Constant             | 3.032***<br>(0.076) | 2.553***<br>(0.189) | 2.691***<br>(0.100)       | 2.779***<br>(0.197) | 2.736***<br>(0.091)       |
| Observations         | 1,154               | 4,705               | 3,544                     | 4,705               | 3,544                     |
| R-squared            | 0.588               | 0.549               | 0.525                     | 0.368               | 0.409                     |
| Firm-Year            | Yes                 | Yes                 | Yes                       | No                  | No                        |
| Industry-Year        | Yes                 | Yes                 | Yes                       | No                  | No                        |
| Country-Year         | Yes                 | Yes                 | Yes                       | Yes                 | Yes                       |
| Error Clustering     | Yes                 | Yes                 | Yes                       | Yes                 | Yes                       |

**Table B5: Tesla Effect**

This table reports the univariate cumulative abnormal returns (CARs) to show the Tesla Effect. Columns (1) – (3) reports the CARs for full sample, financial sector firms, and non-financial sector firms. Column (4) report the CARs for green bond announcements by the Tesla. Column (5) reports the CARs for full sample excluding Tesla. Column (6) reports the CARs for non-financial sector firms excluding Tesla. All variables are as defined in Appendix A. Standard errors are reported in parentheses. \*\*\*, \*\*, and \* denote statistical significance at the two-tailed 1%, 5%, and 10% level, respectively.

| Sample: 2013-2022 |                   |                   |                      |                     |                           |                                    |
|-------------------|-------------------|-------------------|----------------------|---------------------|---------------------------|------------------------------------|
|                   | Full Sample       | Financial Sector  | Non-Financial Sector | Tesla               | Full Sample (Excl. Tesla) | Non-Financial Sector (Excl. Tesla) |
| Variable\Events   | N=2081            | N=1274            | N=807                | N=30                | N=2051                    | N=777                              |
|                   | (1)               | (2)               | (3)                  | (4)                 | (5)                       | (6)                                |
| CAR (-1,1)        | -0.048<br>(0.070) | 0.024<br>(0.079)  | -0.159<br>(0.130)    | 0.284***<br>(0.110) | -0.052<br>(0.071)         | 0.176<br>(0.135)                   |
| CAR (-2,2)        | -0.040<br>(0.087) | -0.010<br>(0.107) | -0.086<br>(0.147)    | 0.373**<br>(0.187)  | -0.046<br>(0.088)         | -0.104<br>(0.153)                  |
| CAR (-3,3)        | -0.028<br>(0.103) | 0.044<br>(0.127)  | -0.137<br>(0.173)    | 0.318<br>(0.219)    | -0.031<br>(0.104)         | -0.155<br>(0.180)                  |
| CAR (-4,4)        | 0.034<br>(0.118)  | 0.027<br>(0.148)  | 0.045<br>(0.194)     | 0.427*<br>(0.233)   | 0.029<br>(0.120)          | 0.031<br>(0.202)                   |
| CAR (-5,5)        | 0.149<br>(0.129)  | 0.216<br>(0.161)  | 0.040<br>(0.216)     | 0.373<br>(0.273)    | 0.144<br>(0.131)          | 0.027<br>(0.224)                   |
| CAR (-5,10)       | 0.274*<br>(0.157) | 0.330*<br>(0.194) | 0.186<br>(0.266)     | 0.447<br>(0.359)    | 0.271*<br>(0.159)         | 0.176<br>(0.275)                   |

**Table B6: Environmental Performance of Green Bond Issuers:  
Post-Issuance vs. Pre-Issuance**

This table reports the regression results of environmental performance of green bond issuer, post-issuance versus the pre-issuance. The green bond issuer matched with comparable firms based on industry, year, and firm characteristics. Environment performance proxied as *Carbon Emissions Risk*, *Water Stress Risk*, *Biodiversity Risk*, *Toxic Emissions Risk*, *Overall Environment Risk Score*, *Carbon Intensity*, *Environmental Score (E Score)*, and *ESG Score* from MSCI ESG Rating, Trucost, and Refinitiv databases. Panel A show the regression results of green bond issuer for environmental risk exposures from MSCI Rating database. *Post-Issuance* is a dummy variable which takes value 1 if a firm has at least one green bond under maturity in that year; otherwise, 0. Country-year denotes country-by-year fixed effects, industry-year denotes industry-by-year fixed effect, and cluster (industry) denotes clustering errors at the industry (BICS level 2) level. All variables are as defined in Appendix A. Standard errors are reported in parentheses. \*\*\*, \*\*, and \* denote statistical significance at the two-tailed 1%, 5%, and 10% level, respectively.

**Panel A: Environmental Risks Exposure**

Panel A reports the regression estimates of environmental risks exposure for a green bond issuer in pre-issuance period compared to post-issuance period. for environmental risk exposures from MSCI Rating database. *Post-Issuance* is a dummy variable which takes value 1 if a firm has at least one green bond under maturity in that year; otherwise, 0. Column 1 provides the regression results of the Carbon Emissions Risk on the *Post-Issuance* indicator, Column 2 provides the regression results of the Water Stress Risk on the *Post-Issuance* indicator, Column 3 provides the regression results of the Biodiversity Risk on the *Post-Issuance* indicator, Column 4 provides the regression results of the *Post-Issuance*, Column 5 provides the regression results of the Overall Environment Risk Score on the *Post-Issuance* indicator.

| VARIABLES     | (1)<br>Carbon<br>Emissions Risk | (2)<br>Water<br>Risk | (3)<br>Biodiversity<br>Risk | (4)<br>Toxic Emissions<br>Waste | (5)<br>Overall Environment<br>Risk Score |
|---------------|---------------------------------|----------------------|-----------------------------|---------------------------------|------------------------------------------|
| Post-Issuance | -0.270***<br>(0.063)            | -0.182***<br>(0.067) | -0.094**<br>(0.041)         | -0.166***<br>(0.059)            | 0.217***<br>(0.033)                      |
| Size          | 0.037<br>(0.023)                | -0.017<br>(0.024)    | -0.034**<br>(0.015)         | 0.052**<br>(0.021)              | 0.052***<br>(0.012)                      |
| Leverage      | -0.001<br>(0.002)               | -0.010***<br>(0.002) | 0.002<br>(0.001)            | -0.012***<br>(0.002)            | 0.002<br>(0.001)                         |
| ROE           | -0.003**<br>(0.001)             | -0.002*<br>(0.001)   | 0.003***<br>(0.001)         | -0.003**<br>(0.001)             | 0.000<br>(0.001)                         |
| Sales Growth  | -0.000<br>(0.001)               | -0.002**<br>(0.001)  | -0.000<br>(0.000)           | -0.000<br>(0.001)               | -0.000<br>(0.000)                        |
| Constant      | 2.997***<br>(0.286)             | 4.573***<br>(0.301)  | 2.901***<br>(0.183)         | 3.178***<br>(0.265)             | 0.964***<br>(0.148)                      |
| Observations  | 3,036                           | 3,036                | 3,036                       | 3,036                           | 3,036                                    |
| R-squared     | 0.715                           | 0.710                | 0.860                       | 0.806                           | 0.795                                    |
| Industry-Year | Yes                             | Yes                  | Yes                         | Yes                             | Yes                                      |
| Country-Year  | Yes                             | Yes                  | Yes                         | Yes                             | Yes                                      |

**Panel B: Carbon Intensity, Environmental Score, and ESG Score**

Panel B reports the regression estimates of green bond issuer for carbon intensity, environmental score (E Score), and esg score (ESG Score). *Post-Issuance* is a dummy variable which takes value 1 if a firm has at least one green bond under maturity in that year. Column 1 provides the regression results of the Carbon Intensity Scope 1 on the *Post-Issuance* indicator, Column 2 provides the regression results of the Carbon Intensity Scope 2 on the *Post-Issuance* indicator, Column 3 provides the regression results of the Environmental Score on the *Post-Issuance* indicator, ESG Score provides the regression results of the *Post-Issuance*.

| VARIABLES     | (1)<br>Carbon Intensity<br>Scope 1 | (2)<br>Carbon Intensity<br>Scope 2 | (3)<br>Environmental Score | (4)<br>ESG Score      |
|---------------|------------------------------------|------------------------------------|----------------------------|-----------------------|
| Post-Issuance | 2.980<br>(6.646)                   | 8.471<br>(6.851)                   | 5.094***<br>(1.095)        | 4.135***<br>(0.923)   |
| Size          | 7.347***<br>(2.419)                | 5.956**<br>(2.521)                 | 7.977***<br>(0.431)        | 6.765***<br>(0.363)   |
| Leverage      | -0.184<br>(0.198)                  | -0.192<br>(0.206)                  | -0.107***<br>(0.033)       | -0.075***<br>(0.028)  |
| ROE           | 0.085<br>(0.147)                   | 0.285**<br>(0.135)                 | -0.011<br>(0.021)          | -0.020<br>(0.018)     |
| Sales Growth  | 0.010<br>(0.087)                   | 0.195*<br>(0.115)                  | -0.056***<br>(0.015)       | -0.045***<br>(0.013)  |
| Constant      | -22.940<br>(29.983)                | -11.357<br>(31.295)                | -46.035***<br>(5.451)      | -36.067***<br>(4.595) |
| Observations  | 2,575                              | 2,496                              | 2,476                      | 2,476                 |
| R-squared     | 0.582                              | 0.586                              | 0.631                      | 0.657                 |
| Industry-Year | Yes                                | Yes                                | Yes                        | Yes                   |
| Country-Year  | Yes                                | Yes                                | Yes                        | Yes                   |
